# Supplementary material
Source: PubMed Central journal article supplement (PMC1761958)
Supplement: plntphys_pp.106.091496_1.pdf [file plntphys_pp.106.091496_1.pdf]

**Supplemental Table S1 : Characterization of GluCer species by mass spectrometry.**

Exact mass measurements (MS mode) and fragment ions obtained by MS<sup>2</sup> (a) and MS<sup>3</sup> (b) modes for singly charged ions (lithium adducts) of DRM GluCer produced in the electrospray ionisation mode. Nomenclature of ceramide fragment ions is according to Domon and Costello (1988), Adams and Ann (1993) and Levery et al. (2000).

| <b>fatty acid</b><br><i>sphingosine</i><br>(formula)                                                    | Measured<br>m/z<br>(M+Li) <sup>+</sup> ion | Calculated<br>m/z<br>(M+Li) <sup>+</sup> ion | Y0<br>(a)<br>m/z | Z0<br>(a)<br>m/z | O<br>(a)<br>m/z | Z0/G<br>(b)<br>m/z | Y0/O<br>(b)<br>m/z | C1<br>(b)<br>m/z |
|---------------------------------------------------------------------------------------------------------|--------------------------------------------|----------------------------------------------|------------------|------------------|-----------------|--------------------|--------------------|------------------|
| <b>16:0</b><br><i>d 18:2</i><br>(C <sub>40</sub> H <sub>75</sub> O <sub>8</sub> NLi) <sup>+</sup>       | 704.5705                                   | 704.5653                                     | 542.5            | 524.3            | 450.4           | 304.3              | 304.3              | 187.1            |
| <b>h 16:0</b><br><i>d 18:2</i><br>(C <sub>40</sub> H <sub>75</sub> O <sub>9</sub> NLi) <sup>+</sup>     | 720.5617                                   | 720.5602                                     | 558.5            | 540.5            | 466.4           | 304.3              | 304.3              | 187.1            |
| <b>h 16:0-OH</b><br><i>d 18:2</i><br>(C <sub>40</sub> H <sub>75</sub> O <sub>10</sub> NLi) <sup>+</sup> | 736.5450                                   | 736.5551                                     | 574.5            | 556.5            | 482.4           | 304.3              | 320.3              | 187.1            |

**Adams J, Ann Q** (1993) Structure determination of sphingolipids by mass spectrometry. *Mass Spectrom Rev.* 12: 51-85

**Domon B, Costello CE** (1988) Structure elucidation of glycosphingolipids and gangliosides using high-performance tandem mass spectrometry. *Biochemistry* 27:1534-1543

**Levery SB, Toledo MS, Doong RL, Straus AH, Takahashi HK** (2000). Comparative analysis of ceramide structural modification found in fungal cerebrosides by electrospray tandem mass spectrometry with low energy collision-induced dissociation of Li<sup>+</sup> adduct ions. *Rapid Commun Mass Spectrom.* 14:551-563.
